# Supplementary material
Source: MDPI journal article supplement (https://www.mdpi.com/2073-4395/12/8/1799)
Supplement: s1 [file s1]

**Table S1.** Free aromatic fraction profile (Values are expressed as percentages).

| Variety | Year   | %ALCOHOLS               | %ACIDS                  | %ALDEHYDES           | %C6                     | %THIOLS              | %ESTERS              | %PHENOLS              |
|---------|--------|-------------------------|-------------------------|----------------------|-------------------------|----------------------|----------------------|-----------------------|
| AT      | [2015] | 21.85                   | 10.99                   | 1.56                 | 55.29                   | n.d.                 | n.d.                 | n.d.                  |
|         | [2016] | 13.71                   | 10.14                   | 0.14                 | 72.46                   | n.d.                 | 0.72                 | 0.64                  |
|         | [2017] | 15.02                   | 5.50                    | n.d.                 | 75.13                   | n.d.                 | 0.27                 | 0.49                  |
|         |        | <b>16.86 ± 4.37 ab</b>  | <b>8.88 ± 2.96 ab</b>   | <b>0.57 ± 0.86 a</b> | <b>67.63 ± 10.77 bc</b> | <b>n.d. a</b>        | <b>0.33 ± 0.36 a</b> | <b>0.38 ± 0.34 ab</b> |
| CO      | [2015] | 22.96                   | 26.00                   | 1.67                 | 38.75                   | n.d.                 | n.d.                 | 0.46                  |
|         | [2016] | 15.85                   | 2.99                    | 0.38                 | 77.21                   | n.d.                 | 0.18                 | 0.18                  |
|         | [2017] | 9.62                    | 3.22                    | 1.72                 | 81.85                   | 0.51                 | n.d.                 | n.d.                  |
|         |        | <b>16.14 ± 6.68 ab</b>  | <b>10.74 ± 13.22 ab</b> | <b>1.26 ± 0.76 a</b> | <b>65.94 ± 23.66 bc</b> | <b>0.17 ± 0.29 a</b> | <b>0.06 ± 0.11 a</b> | <b>0.21 ± 0.23 ab</b> |
| ES      | [2015] | 8.33                    | 8.72                    | 0.67                 | 78.05                   | n.d.                 | 0.29                 | 0.20                  |
|         | [2016] | 22.81                   | 3.83                    | 0.79                 | 64.33                   | n.d.                 | 0.14                 | 1.32                  |
|         | [2017] | 16.35                   | 5.72                    | 0.74                 | 71.19                   | n.d.                 | 0.15                 | 0.28                  |
|         |        | <b>15.83 ± 7.25 ab</b>  | <b>6.09 ± 2.46 ab</b>   | <b>0.73 ± 0.06 a</b> | <b>71.19 ± 6.86 bc</b>  | <b>n.d. a</b>        | <b>0.20 ± 0.08 a</b> | <b>0.60 ± 0.62 ab</b> |
| EV3     | [2015] | 10.33                   | 12.51                   | 0.16                 | 71.19                   | n.d.                 | n.d.                 | n.d.                  |
|         | [2016] | 36.15                   | 6.57                    | n.d.                 | 45.41                   | n.d.                 | n.d.                 | 0.85                  |
|         | [2017] | 6.79                    | 3.40                    | 1.37                 | 82.82                   | n.d.                 | 0.14                 | 0.45                  |
|         |        | <b>17.76 ± 16.03 ab</b> | <b>7.49 ± 4.62 ab</b>   | <b>0.51 ± 0.75 a</b> | <b>66.47 ± 19.15 bc</b> | <b>n.d. a</b>        | <b>0.05 ± 0.08 a</b> | <b>0.43 ± 0.42 ab</b> |
| EV4     | [2015] | 19.81                   | 16.04                   | 1.48                 | 53.61                   | n.d.                 | n.d.                 | 0.59                  |
|         | [2016] | 10.99                   | 3.79                    | 0.43                 | 81.71                   | n.d.                 | n.d.                 | 0.63                  |
|         | [2017] | 22.19                   | 4.06                    | n.d.                 | 66.22                   | n.d.                 | n.d.                 | 0.14                  |
|         |        | <b>17.66 ± 5.90 ab</b>  | <b>7.96 ± 6.99 ab</b>   | <b>0.64 ± 0.76 a</b> | <b>67.18 ± 14.07 bc</b> | <b>n.d. a</b>        | <b>n.d. a</b>        | <b>0.45 ± 0.27 ab</b> |
| EV6     | [2015] | 17.71                   | 21.78                   | 1.12                 | 54.86                   | n.d.                 | n.d.                 | 0.27                  |
|         | [2016] | 41.30                   | 14.08                   | 3.45                 | 33.96                   | n.d.                 | 0.45                 | 0.72                  |
|         | [2017] | 10.73                   | 3.29                    | 1.89                 | 80.08                   | 0.23                 | 0.38                 | 0.06                  |
|         |        | <b>23.25 ± 16.02 ab</b> | <b>13.05 ± 9.28 ab</b>  | <b>2.16 ± 1.19 a</b> | <b>56.30 ± 23.09 bc</b> | <b>0.08 ± 0.13 a</b> | <b>0.28 ± 0.24 a</b> | <b>0.35 ± 0.34 ab</b> |
| FE      | [2015] | 11.09                   | 58.26                   | 0.63                 | 25.73                   | n.d.                 | n.d.                 | 0.70                  |
|         | [2016] | 8.84                    | 2.04                    | 5.12                 | 78.27                   | n.d.                 | 2.28                 | 0.08                  |

|    |        |                         |                        |                      |                         |                      |                       |                        |
|----|--------|-------------------------|------------------------|----------------------|-------------------------|----------------------|-----------------------|------------------------|
| GA | [2017] | 20.82                   | 5.03                   | n.d.                 | 68.24                   | n.d.                 | 0.14                  | 0.49                   |
|    |        | <b>13.58 ± 6.37 ab</b>  | <b>21.77 ± 31.63 b</b> | <b>1.92 ± 2.79 a</b> | <b>57.41 ± 27.89 bc</b> | <b>n.d. a</b>        | <b>0.80 ± 1.28 ab</b> | <b>0.42 ± 0.32 ab</b>  |
|    | [2015] | 9.60                    | 15.60                  | 0.96                 | 64.89                   | n.d.                 | 0.18                  | 0.40                   |
|    | [2016] | 13.30                   | 5.82                   | 0.31                 | 77.82                   | n.d.                 | n.d.                  | 0.08                   |
|    | [2017] | 25.90                   | 9.38                   | 0.62                 | 47.33                   | n.d.                 | n.d.                  | 0.75                   |
| GN |        | <b>16.27 ± 8.54 ab</b>  | <b>10.27 ± 4.95 ab</b> | <b>0.63 ± 0.32 a</b> | <b>63.34 ± 15.30 bc</b> | <b>n.d. a</b>        | <b>0.06 ± 0.10 a</b>  | <b>0.41 ± 0.34 ab</b>  |
|    | [2016] | 17.36                   | 6.82                   | 1.24                 | 66.48                   | n.d.                 | n.d.                  | 0.41                   |
|    | [2017] | 15.96                   | 7.11                   | 1.69                 | 68.87                   | n.d.                 | 0.09                  | 0.92                   |
|    |        | <b>16.66 ± 0.99 ab</b>  | <b>6.96 ± 0.21 ab</b>  | <b>1.46 ± 0.31 a</b> | <b>67.68 ± 1.69 bc</b>  | <b>n.d. a</b>        | <b>0.04 ± 0.06 a</b>  | <b>0.66 ± 0.36 abc</b> |
| HI | [2015] | 15.94                   | 13.27                  | 1.11                 | 50.40                   | n.d.                 | 1.02                  | 0.34                   |
|    | [2016] | 17.80                   | 7.45                   | 0.44                 | 63.91                   | n.d.                 | 0.37                  | 0.24                   |
|    |        | <b>16.87 ± 1.32 ab</b>  | <b>10.36 ± 4.11 ab</b> | <b>0.78 ± 0.47 a</b> | <b>57.15 ± 9.55 bc</b>  | <b>n.d. a</b>        | <b>0.70 ± 0.46 ab</b> | <b>0.29 ± 0.07 ab</b>  |
|    |        |                         |                        |                      |                         |                      |                       |                        |
| MA | [2015] | 4.12                    | 8.62                   | 1.74                 | 81.97                   | n.d.                 | 0.34                  | 0.84                   |
|    | [2016] | 10.50                   | 3.21                   | 1.62                 | 79.09                   | n.d.                 | 0.12                  | 0.56                   |
|    | [2017] | 13.07                   | 5.14                   | 1.58                 | 75.44                   | 0.14                 | 0.50                  | 0.85                   |
|    |        | <b>9.23 ± 4.61 a</b>    | <b>5.65 ± 2.74 a</b>   | <b>1.65 ± 0.08 a</b> | <b>78.83 ± 3.27 c</b>   | <b>0.05 ± 0.08 a</b> | <b>0.32 ± 0.19 a</b>  | <b>0.75 ± 0.17 bc</b>  |
| ME | [2015] | 2.44                    | 2.64                   | 0.37                 | 81.05                   | n.d.                 | 1.07                  | 0.10                   |
|    | [2016] | 11.03                   | 2.14                   | 4.49                 | 78.54                   | n.d.                 | n.d.                  | 0.07                   |
|    | [2017] | 38.89                   | 15.65                  | n.d.                 | 29.43                   | 0.63                 | n.d.                  | 0.91                   |
|    |        | <b>17.45 ± 19.06 ab</b> | <b>6.81 ± 7.66 ab</b>  | <b>1.62 ± 2.49 a</b> | <b>63.00 ± 29.11 bc</b> | <b>0.21 ± 0.36 a</b> | <b>0.36 ± 0.62 ab</b> | <b>0.36 ± 0.48 ab</b>  |
| MZ | [2015] | 12.80                   | 21.73                  | 1.13                 | 57.67                   | n.d.                 | n.d.                  | 0.16                   |
|    | [2016] | 12.99                   | 11.48                  | 0.79                 | 69.82                   | 0.16                 | 0.28                  | 0.28                   |
|    | [2017] | 38.70                   | 4.17                   | 0.89                 | 42.96                   | n.d.                 | n.d.                  | 0.24                   |
|    |        | <b>21.50 ± 14.90 ab</b> | <b>12.46 ± 8.82 ab</b> | <b>0.94 ± 0.18 a</b> | <b>56.82 ± 13.45 bc</b> | <b>0.05 ± 0.09 a</b> | <b>0.09 ± 0.16 a</b>  | <b>0.23 ± 0.06 ab</b>  |
|    |        |                         |                        |                      |                         |                      |                       |                        |
| MH | [2015] | 8.16                    | 5.41                   | n.d.                 | 4.63                    | n.d.                 | n.d.                  | 0.30                   |
|    | [2016] | 15.08                   | 6.06                   | 1.14                 | 21.56                   | n.d.                 | n.d.                  | 0.96                   |
|    | [2017] | 14.15                   | 0.87                   | 0.48                 | 19.41                   | 0.52                 | 1.71                  | 0.20                   |
|    |        | <b>12.46 ± 3.76 ab</b>  | <b>4.11 ± 2.82 a</b>   | <b>0.54 ± 0.57 a</b> | <b>15.20 ± 9.22 a</b>   | <b>0.17 ± 0.30 a</b> | <b>0.57 ± 0.99 ab</b> | <b>0.49 ± 0.42 ab</b>  |
| MO | [2015] | 19.41                   | 14.69                  | n.d.                 | 58.61                   | 0.18                 | n.d.                  | 0.35                   |

|              | [2016] | 25.69                   | 12.81                   | 3.27                 | 52.68                   | n.d.                 | 0.30                  | 1.04                  |
|--------------|--------|-------------------------|-------------------------|----------------------|-------------------------|----------------------|-----------------------|-----------------------|
|              | [2017] | 35.69                   | 9.42                    | 0.68                 | 38.53                   | 0.47                 | 0.49                  | 0.61                  |
|              |        | <b>26.93 ± 8.21 b</b>   | <b>12.30 ± 2.67 ab</b>  | <b>1.32 ± 1.72 a</b> | <b>49.94 ± 10.32 b</b>  | <b>0.22 ± 0.24 a</b> | <b>0.26 ± 0.25 a</b>  | <b>0.67 ± 0.35 bc</b> |
|              |        |                         |                         |                      |                         |                      |                       |                       |
| PE           | [2016] | 14.64                   | 1.35                    | n.d.                 | 76.55                   | n.d.                 | 4.10                  | 0.47                  |
|              | [2017] | 15.83                   | 2.23                    | 0.53                 | 73.82                   | n.d.                 | 1.79                  | n.d.                  |
|              |        | <b>15.23 ± 0.84 ab</b>  | <b>1.79 ± 0.62 a</b>    | <b>0.26 ± 0.37 a</b> | <b>75.18 ± 1.93 bc</b>  | <b>n.d. a</b>        | <b>2.95 ± 1.64 c</b>  | <b>0.23 ± 0.33 ab</b> |
|              |        |                         |                         |                      |                         |                      |                       |                       |
| PC           | [2015] | 4.78                    | 3.93                    | n.d.                 | 84.80                   | n.d.                 | 0.58                  | 0.16                  |
|              | [2016] | 28.07                   | 11.89                   | 2.29                 | 50.78                   | n.d.                 | 2.26                  | 0.22                  |
|              | [2017] | 28.38                   | 16.40                   | 0.64                 | 43.14                   | n.d.                 | 1.30                  | 0.37                  |
|              |        | <b>20.41 ± 15.54 ab</b> | <b>10.74 ± 6.31 ab</b>  | <b>0.98 ± 1.18 a</b> | <b>59.57 ± 22.18 bc</b> | <b>n.d. a</b>        | <b>1.38 ± 0.84 b</b>  | <b>0.25 ± 0.11 ab</b> |
| PN           | [2015] | 14.88                   | 23.58                   | 0.58                 | 52.12                   | n.d.                 | n.d.                  | 0.61                  |
|              | [2016] | 22.90                   | 1.73                    | 1.53                 | 63.24                   | n.d.                 | 2.14                  | 1.26                  |
|              | [2017] | 25.54                   | 4.81                    | n.d.                 | 60.96                   | n.d.                 | 0.25                  | 1.71                  |
|              |        | <b>21.11 ± 5.55 ab</b>  | <b>10.04 ± 11.83 ab</b> | <b>0.70 ± 0.77 a</b> | <b>58.77 ± 5.87 bc</b>  | <b>n.d. a</b>        | <b>0.80 ± 1.17 ab</b> | <b>1.19 ± 0.56 c</b>  |
| TE           | [2015] | 15.14                   | 7.90                    | 0.77                 | 69.65                   | 0.16                 | n.d.                  | 0.40                  |
|              | [2016] | 13.11                   | 1.92                    | 1.32                 | 77.80                   | 0.07                 | 0.13                  | 0.17                  |
|              | [2017] | 19.38                   | 9.10                    | 1.97                 | 59.24                   | n.d.                 | n.d.                  | 0.34                  |
|              |        | <b>15.88 ± 3.20 ab</b>  | <b>6.30 ± 3.85 ab</b>   | <b>1.35 ± 0.60 a</b> | <b>68.89 ± 9.30 bc</b>  | <b>0.08 ± 0.08 a</b> | <b>0.04 ± 0.07 a</b>  | <b>0.30 ± 0.12 ab</b> |
| XA           | [2019] | 13.40                   | 14.12                   | 0.86                 | 62.89                   | n.d.                 | n.d.                  | n.d.                  |
|              | [2020] | 8.88                    | 10.30                   | 0.11                 | 75.64                   | n.d.                 | n.d.                  | n.d.                  |
|              |        | <b>11.14 ± 3.19 ab</b>  | <b>12.21 ± 2.70 ab</b>  | <b>0.48 ± 0.53 a</b> | <b>69.26 ± 9.01 bc</b>  | <b>n.d. a</b>        | <b>n.d. a</b>         | <b>n.d. a</b>         |
|              |        |                         |                         |                      |                         |                      |                       |                       |
| ZA           | [2015] | 10.20                   | 4.93                    | n.d.                 | 66.68                   | n.d.                 | n.d.                  | 0.45                  |
|              | [2016] | 27.23                   | 2.87                    | 1.87                 | 59.43                   | 0.14                 | 1.18                  | 0.84                  |
|              | [2017] | 14.51                   | 1.57                    | 0.13                 | 79.43                   | n.d.                 | n.d.                  | n.d.                  |
|              |        | <b>17.31 ± 8.85 ab</b>  | <b>3.12 ± 1.69 a</b>    | <b>0.67 ± 1.04 a</b> | <b>68.51 ± 10.13 bc</b> | <b>0.05 ± 0.08 a</b> | <b>0.39 ± 0.68 ab</b> | <b>0.43 ± 0.42 ab</b> |
| Significance |        | ns                      | ns                      | ns                   | *                       | ns                   | *                     | ns                    |
| Variety      | Year   | %KETONES                | %LACTONS                | %TERPENES            | %NORISOPRENOIDS         | %PAH'S               | %SESQUITERPENES       |                       |
| AT           | [2015] | 4.26                    | 3.45                    | 0.46                 | n.d.                    | 2.13                 | n.d.                  |                       |
|              | [2016] | 0.62                    | n.d.                    | 0.32                 | n.d.                    | 1.25                 | n.d.                  |                       |

|     |        |                        |                      |                       |                       |                         |                      |
|-----|--------|------------------------|----------------------|-----------------------|-----------------------|-------------------------|----------------------|
| CO  | [2017] | 1.53                   | n.d.                 | 1.05                  | 0.11                  | 0.91                    | n.d.                 |
|     |        | <b>2.14 ± 1.90 abc</b> | <b>1.15 ± 1.99 a</b> | <b>0.61 ± 0.39 a</b>  | <b>0.04 ± 0.06 a</b>  | <b>1.43 ± 0.63 abc</b>  | <b>n.d. a</b>        |
|     | [2015] | 5.30                   | 1.19                 | 0.26                  | 0.82                  | 2.59                    | n.d.                 |
|     | [2016] | 1.59                   | 0.51                 | n.d.                  | n.d.                  | 1.10                    | n.d.                 |
|     | [2017] | 1.77                   | 0.27                 | 0.09                  | 0.10                  | 0.80                    | 0.05                 |
|     |        | <b>2.89 ± 2.09 abc</b> | <b>0.66 ± 0.48 a</b> | <b>0.12 ± 0.13 a</b>  | <b>0.31 ± 0.45 ab</b> | <b>1.50 ± 0.96 abc</b>  | <b>0.02 ± 0.03 a</b> |
|     | ES     | [2015]                 | 2.14                 | 0.28                  | 0.02                  | 0.10                    | n.d.                 |
|     |        | [2016]                 | 2.99                 | n.d.                  | 0.41                  | n.d.                    | n.d.                 |
|     |        | [2017]                 | 2.57                 | 0.29                  | 0.79                  | 0.55                    | n.d.                 |
|     |        | <b>2.57 ± 0.42 abc</b> | <b>0.19 ± 0.17 a</b> | <b>0.40 ± 0.38 a</b>  | <b>0.22 ± 0.29 ab</b> | <b>1.98 ± 1.22 abcd</b> | <b>n.d. a</b>        |
| EV3 | [2015] | 2.85                   | n.d.                 | 1.27                  | 0.31                  | 1.37                    | n.d.                 |
|     | [2016] | 3.44                   | 1.49                 | 1.84                  | n.d.                  | 4.25                    | n.d.                 |
|     | [2017] | 1.51                   | 2.29                 | 1.23                  | n.d.                  | n.d.                    | n.d.                 |
|     |        | <b>2.60 ± 0.99 abc</b> | <b>1.26 ± 1.16 a</b> | <b>1.45 ± 0.34 ab</b> | <b>0.10 ± 0.18 ab</b> | <b>1.87 ± 2.17 abcd</b> | <b>n.d. a</b>        |
| EV4 | [2015] | 5.40                   | n.d.                 | 0.33                  | n.d.                  | 2.08                    | 0.64                 |
|     | [2016] | 1.45                   | 0.80                 | 0.08                  | n.d.                  | 0.13                    | n.d.                 |
|     | [2017] | 3.91                   | n.d.                 | 0.26                  | n.d.                  | 3.22                    | n.d.                 |
|     |        | <b>3.59 ± 2.00 bc</b>  | <b>0.27 ± 0.46 a</b> | <b>0.23 ± 0.13 a</b>  | <b>n.d. a</b>         | <b>1.81 ± 1.56 abcd</b> | <b>0.21 ± 0.37 b</b> |
| EV6 | [2015] | 3.39                   | 0.43                 | n.d.                  | 0.44                  | n.d.                    | n.d.                 |
|     | [2016] | 5.95                   | n.d.                 | 0.07                  | n.d.                  | n.d.                    | n.d.                 |
|     | [2017] | 1.58                   | 0.51                 | 0.02                  | n.d.                  | 1.18                    | 0.04                 |
|     |        | <b>3.64 ± 2.20 bc</b>  | <b>0.31 ± 0.27 a</b> | <b>0.03 ± 0.04 a</b>  | <b>0.15 ± 0.25 ab</b> | <b>0.39 ± 0.68 a</b>    | <b>0.01 ± 0.02 a</b> |
| FE  | [2015] | n.d.                   | n.d.                 | 0.63                  | 1.91                  | 1.05                    | n.d.                 |
|     | [2016] | n.d.                   | 2.10                 | n.d.                  | n.d.                  | 1.28                    | n.d.                 |
|     | [2017] | n.d.                   | n.d.                 | 1.34                  | 1.01                  | 2.93                    | n.d.                 |
|     |        | <b>n.d. a</b>          | <b>0.70 ± 1.21 a</b> | <b>0.66 ± 0.67 a</b>  | <b>0.98 ± 0.96 bc</b> | <b>1.76 ± 1.03 abcd</b> | <b>n.d. a</b>        |
| GA  | [2015] | 3.82                   | n.d.                 | 0.73                  | 0.15                  | 3.69                    | n.d.                 |
|     | [2016] | 1.19                   | n.d.                 | 0.29                  | n.d.                  | 1.19                    | n.d.                 |
|     | [2017] | 7.37                   | n.d.                 | 3.72                  | 0.57                  | 4.36                    | n.d.                 |

|    |        |                        |                      |                        |                       |                         |                       |
|----|--------|------------------------|----------------------|------------------------|-----------------------|-------------------------|-----------------------|
| GN |        | <b>4.13 ± 3.10 bc</b>  | <b>n.d. a</b>        | <b>1.58 ± 1.87 ab</b>  | <b>0.24 ± 0.30 ab</b> | <b>3.08 ± 1.67 cd</b>   | <b>n.d. a</b>         |
|    | [2016] | 4.08                   | 2.20                 | n.d.                   | n.d.                  | 1.41                    | n.d.                  |
|    | [2017] | 1.76                   | 1.64                 | 1.02                   | n.d.                  | 0.94                    | n.d.                  |
|    |        | <b>2.92 ± 1.64 abc</b> | <b>1.92 ± 0.40 a</b> | <b>0.51 ± 0.72 a</b>   | <b>n.d. a</b>         | <b>1.17 ± 0.33 abc</b>  | <b>n.d. a</b>         |
| HI | [2015] | 6.39                   | n.d.                 | 7.83                   | 0.16                  | 3.17                    | 0.38                  |
|    | [2016] | 2.77                   | n.d.                 | 5.44                   | 0.09                  | 1.47                    | n.d.                  |
|    |        | <b>4.58 ± 2.55 bc</b>  | <b>n.d. a</b>        | <b>6.63 ± 1.69 b</b>   | <b>0.12 ± 0.04 ab</b> | <b>2.32 ± 1.20 abcd</b> | <b>0.19 ± 0.27 b</b>  |
|    | [2015] | 1.04                   | n.d.                 | 0.37                   | 0.34                  | 0.62                    | n.d.                  |
| MA | [2016] | 1.87                   | 2.14                 | 0.10                   | n.d.                  | 0.80                    | n.d.                  |
|    | [2017] | 1.81                   | n.d.                 | 0.19                   | 0.11                  | 1.16                    | n.d.                  |
|    |        | <b>1.57 ± 0.46 ab</b>  | <b>0.71 ± 1.24 a</b> | <b>0.22 ± 0.14 a</b>   | <b>0.15 ± 0.17 ab</b> | <b>0.86 ± 0.27 ab</b>   | <b>n.d. a</b>         |
|    | [2015] | 5.70                   | n.d.                 | 0.10                   | n.d.                  | 6.54                    | n.d.                  |
| ME | [2016] | 1.79                   | n.d.                 | 0.04                   | n.d.                  | 1.90                    | n.d.                  |
|    | [2017] | 7.57                   | 3.87                 | 0.24                   | n.d.                  | 2.82                    | n.d.                  |
|    |        | <b>5.02 ± 2.95 c</b>   | <b>1.29 ± 2.24 a</b> | <b>0.13 ± 0.10 a</b>   | <b>n.d. a</b>         | <b>3.75 ± 2.46 d</b>    | <b>n.d. a</b>         |
|    |        |                        |                      |                        |                       |                         |                       |
| MZ | [2015] | 3.90                   | n.d.                 | 0.23                   | 0.15                  | 2.22                    | n.d.                  |
|    | [2016] | 2.66                   | n.d.                 | 0.05                   | n.d.                  | 1.49                    | n.d.                  |
|    | [2017] | 5.67                   | 3.53                 | 1.00                   | 0.52                  | 2.08                    | 0.23                  |
|    |        | <b>4.08 ± 1.52 bc</b>  | <b>1.18 ± 2.04 a</b> | <b>0.43 ± 0.50 a</b>   | <b>0.22 ± 0.27 ab</b> | <b>1.93 ± 0.39 abcd</b> | <b>0.08 ± 0.14 ab</b> |
| MH | [2015] | 2.08                   | 0.14                 | 77.35                  | n.d.                  | 1.94                    | n.d.                  |
|    | [2016] | 0.99                   | 1.96                 | 51.55                  | n.d.                  | 0.69                    | n.d.                  |
|    | [2017] | 1.84                   | n.d.                 | 59.77                  | n.d.                  | 1.04                    | n.d.                  |
|    |        | <b>1.64 ± 0.57 ab</b>  | <b>0.70 ± 1.10 a</b> | <b>62.89 ± 13.18 c</b> | <b>n.d. a</b>         | <b>1.22 ± 0.64 abc</b>  | <b>n.d. a</b>         |
| MO | [2015] | 3.23                   | n.d.                 | 0.11                   | 0.12                  | 3.30                    | n.d.                  |
|    | [2016] | 2.97                   | n.d.                 | 0.03                   | n.d.                  | 1.21                    | n.d.                  |
|    | [2017] | 8.07                   | n.d.                 | 0.54                   | n.d.                  | 5.19                    | 0.31                  |
|    |        | <b>4.76 ± 2.87 c</b>   | <b>n.d. a</b>        | <b>0.23 ± 0.27 a</b>   | <b>0.04 ± 0.07 a</b>  | <b>3.23 ± 1.99 cd</b>   | <b>0.10 ± 0.18 ab</b> |
| PE | [2016] | 1.96                   | n.d.                 | n.d.                   | 0.00                  | 0.88                    | 0.05                  |
|    | [2017] | 2.43                   | 1.31                 | 0.28                   | 0.21                  | 1.49                    | 0.08                  |

|              |        |                        |                      |                       |                        |                         |                       |
|--------------|--------|------------------------|----------------------|-----------------------|------------------------|-------------------------|-----------------------|
| PC           |        | <b>2.19 ± 0.34 abc</b> | <b>0.65 ± 0.93 a</b> | <b>0.14 ± 0.20 a</b>  | <b>0.10 ± 0.15 ab</b>  | <b>1.19 ± 0.43 abc</b>  | <b>0.07 ± 0.02 ab</b> |
|              | [2015] | 1.65                   | 0.86                 | n.d.                  | n.d.                   | 3.24                    | n.d.                  |
|              | [2016] | 2.48                   | n.d.                 | 0.21                  | n.d.                   | 1.77                    | 0.03                  |
|              | [2017] | 4.63                   | n.d.                 | 0.95                  | 0.37                   | 3.82                    | n.d.                  |
|              |        | <b>2.92 ± 1.54 abc</b> | <b>0.29 ± 0.49 a</b> | <b>0.38 ± 0.50 a</b>  | <b>0.12 ± 0.21 ab</b>  | <b>2.94 ± 1.06 bcd</b>  | <b>0.01 ± 0.02 a</b>  |
|              |        |                        |                      |                       |                        |                         |                       |
| PN           | [2015] | 3.70                   | n.d.                 | 0.43                  | 2.15                   | 1.89                    | 0.06                  |
|              | [2016] | 2.49                   | 3.18                 | 0.14                  | n.d.                   | 1.39                    | n.d.                  |
|              | [2017] | 1.88                   | 2.00                 | 0.97                  | n.d.                   | 1.83                    | 0.04                  |
|              |        | <b>2.69 ± 0.92 abc</b> | <b>1.73 ± 1.61 a</b> | <b>0.51 ± 0.42 a</b>  | <b>0.72 ± 1.24 abc</b> | <b>1.70 ± 0.27 abcd</b> | <b>0.03 ± 0.03 ab</b> |
| TE           | [2015] | 3.61                   | n.d.                 | n.d.                  | 0.08                   | 2.09                    | 0.21                  |
|              | [2016] | 2.09                   | 0.92                 | 0.92                  | 0.14                   | 1.43                    | n.d.                  |
|              | [2017] | 2.93                   | 3.26                 | 1.30                  | n.d.                   | 2.35                    | 0.13                  |
|              |        | <b>2.87 ± 0.76 abc</b> | <b>1.39 ± 1.68 a</b> | <b>0.74 ± 0.67 a</b>  | <b>0.07 ± 0.07 a</b>   | <b>1.96 ± 0.48 abcd</b> | <b>0.11 ± 0.11 ab</b> |
|              |        |                        |                      |                       |                        |                         |                       |
| XA           | [2019] | 4.32                   | n.d.                 | 0.53                  | 1.10                   | 2.67                    | 0.10                  |
|              | [2020] | 2.56                   | 0.20                 | 0.30                  | 0.60                   | 1.41                    | n.d.                  |
|              |        | <b>3.44 ± 1.24 bc</b>  | <b>0.10 ± 0.14 a</b> | <b>0.41 ± 0.17 a</b>  | <b>0.85 ± 0.36 abc</b> | <b>2.04 ± 0.89 abcd</b> | <b>0.05 ± 0.07 ab</b> |
| ZA           | [2015] | 3.27                   | n.d.                 | 10.24                 | 2.69                   | 1.38                    | 0.15                  |
|              | [2016] | 4.74                   | n.d.                 | 0.07                  | n.d.                   | 1.62                    | n.d.                  |
|              | [2017] | 0.44                   | 0.08                 | 1.36                  | 1.14                   | 1.28                    | 0.06                  |
|              |        | <b>2.82 ± 2.19 abc</b> | <b>0.03 ± 0.05 a</b> | <b>3.89 ± 5.54 ab</b> | <b>1.28 ± 1.35 c</b>   | <b>1.43 ± 0.17 abc</b>  | <b>0.07 ± 0.08 ab</b> |
| Significance |        | ns                     | ns                   | ***                   | ns                     | ns                      | ns                    |

PAHs.: polycyclic aromatic hydrocarbons; n.d.: non detected; ns indicates non-significant difference. Mean value, SD and different roman letters (a–d), showing significant differences according to Fisher’s test ( $p < 0.05$ ), are indicated in bold for each variety. See Table 1 for varieties abbreviations.

**Table S2.** Glicosidically bound fraction profile (Values are expressed as percentages).

| Variety | Year   | %ALCOHOLS                | %ACIDS                 | %ALDEHYDES            | %C6                        | %THIOLS              | %ESTERS                 | %PHENOLS                |
|---------|--------|--------------------------|------------------------|-----------------------|----------------------------|----------------------|-------------------------|-------------------------|
| AT      | [2015] | 43.85                    | n.d.                   | n.d.                  | 31.10                      | n.d.                 | 0.59                    | 15.43                   |
|         | [2016] | 60.21                    | 0.55                   | 4.84                  | 12.12                      | n.d.                 | 5.28                    | 8.86                    |
|         | [2017] | 49.08                    | 2.94                   | 1.94                  | 15.95                      | 0.33                 | 9.34                    | 7.70                    |
|         |        | <b>51.05 ± 8.35 de</b>   | <b>1.16 ± 1.56 ab</b>  | <b>2.26 ± 2.44 ab</b> | <b>19.72 ± 10.04 ef</b>    | <b>0.11 ± 0.19 a</b> | <b>5.07 ± 4.38 a</b>    | <b>10.66 ± 4.17 ab</b>  |
| CO      | [2015] | 22.66                    | n.d.                   | 0.08                  | 6.02                       | n.d.                 | 2.86                    | 67.60                   |
|         | [2016] | 14.70                    | 5.04                   | 0.23                  | 7.44                       | n.d.                 | 3.52                    | 67.44                   |
|         | [2017] | 63.93                    | 0.95                   | 1.55                  | 18.70                      | 0.47                 | 6.47                    | 1.34                    |
|         |        | <b>33.77 ± 26.42 bcd</b> | <b>2.00 ± 2.68 abc</b> | <b>0.62 ± 0.81 ab</b> | <b>10.72 ± 6.94 abcde</b>  | <b>0.16 ± 0.27 a</b> | <b>4.28 ± 1.93 a</b>    | <b>45.46 ± 38.21 b</b>  |
| ES      | [2015] | 29.99                    | 0.54                   | 0.18                  | 9.32                       | n.d.                 | 0.93                    | 54.02                   |
|         | [2016] | 60.95                    | 2.31                   | 2.69                  | 25.11                      | n.d.                 | 1.85                    | 3.15                    |
|         | [2017] | 55.75                    | 5.04                   | 1.82                  | 16.53                      | 0.52                 | 7.98                    | 3.25                    |
|         |        | <b>48.90 ± 16.58 cde</b> | <b>2.63 ± 2.27 abc</b> | <b>1.57 ± 1.27 ab</b> | <b>16.99 ± 7.91 cdef</b>   | <b>0.17 ± 0.30 a</b> | <b>3.59 ± 3.83 a</b>    | <b>20.14 ± 29.34 ab</b> |
| EV3     | [2015] | 49.10                    | 0.13                   | 1.94                  | 18.01                      | 0.07                 | 6.94                    | 10.93                   |
|         | [2016] | 23.94                    | 6.58                   | 0.52                  | 3.69                       | n.d.                 | 8.58                    | 47.88                   |
|         | [2017] | 22.27                    | 4.90                   | n.d.                  | 5.13                       | 0.07                 | 3.26                    | 52.80                   |
|         |        | <b>31.77 ± 15.03 bcd</b> | <b>3.87 ± 3.34 abc</b> | <b>0.82 ± 1.00 ab</b> | <b>8.94 ± 7.88 abcde</b>   | <b>0.05 ± 0.04 a</b> | <b>6.26 ± 2.72 a</b>    | <b>37.20 ± 22.89 ab</b> |
| EV4     | [2015] | 29.40                    | n.d.                   | 13.80                 | 23.28                      | n.d.                 | 13.97                   | 1.56                    |
|         | [2016] | 11.87                    | 1.74                   | 0.63                  | 2.78                       | 0.10                 | 36.98                   | 41.35                   |
|         | [2017] | 36.86                    | 13.89                  | n.d.                  | 8.50                       | 0.37                 | 21.98                   | 5.72                    |
|         |        | <b>26.04 ± 12.83 abc</b> | <b>5.21 ± 7.57 abc</b> | <b>4.81 ± 7.79 bc</b> | <b>11.52 ± 10.58 abcde</b> | <b>0.16 ± 0.19 a</b> | <b>24.31 ± 11.68 cd</b> | <b>16.21 ± 21.87 ab</b> |
| EV6     | [2015] | 63.06                    | n.d.                   | 1.86                  | 22.28                      | 1.10                 | 8.04                    | 0.33                    |
|         | [2016] | 46.04                    | 9.19                   | 0.48                  | 8.14                       | n.d.                 | 3.48                    | 29.29                   |
|         | [2017] | 19.48                    | 5.43                   | 0.43                  | 2.80                       | n.d.                 | 4.28                    | 66.06                   |
|         |        | <b>42.86 ± 21.96 cde</b> | <b>4.87 ± 4.62 abc</b> | <b>0.92 ± 0.81 ab</b> | <b>11.07 ± 10.07 abcd</b>  | <b>0.37 ± 0.63 a</b> | <b>5.27 ± 2.44 a</b>    | <b>31.89 ± 32.94 ab</b> |
| FE      | [2015] | 33.83                    | 0.86                   | 0.10                  | 19.27                      | n.d.                 | 37.91                   | 1.99                    |
|         | [2016] | 60.72                    | n.d.                   | 5.02                  | 19.21                      | 0.11                 | 8.41                    | 2.47                    |
|         | [2017] | 57.15                    | 1.30                   | 1.11                  | 18.19                      | n.d.                 | 14.34                   | 2.59                    |

|    |        |                          |                        |                        |                           |                      |                           |                         |
|----|--------|--------------------------|------------------------|------------------------|---------------------------|----------------------|---------------------------|-------------------------|
|    |        | <b>50.57 ± 14.60 de</b>  | <b>0.72 ± 0.66 ab</b>  | <b>2.08 ± 2.60 ab</b>  | <b>18.89 ± 0.61 def</b>   | <b>0.04 ± 0.06 a</b> | <b>20.22 ± 15.61 bcd</b>  | <b>2.35 ± 0.32 a</b>    |
|    | [2016] | 43.57                    | 3.25                   | 2.86                   | 11.99                     | n.d.                 | 17.69                     | 15.98                   |
| GN | [2017] | 57.08                    | 0.28                   | 2.85                   | 20.49                     | 0.08                 | 5.83                      | 2.01                    |
|    |        | <b>50.32 ± 9.55 cde</b>  | <b>1.77 ± 2.10 ab</b>  | <b>2.85 ± 0.01 abc</b> | <b>16.24 ± 6.01 cdef</b>  | <b>0.04 ± 0.06 a</b> | <b>11.76 ± 8.39 abcd</b>  | <b>8.99 ± 9.88 ab</b>   |
|    | [2015] | 32.74                    | 0.18                   | n.d.                   | 9.13                      | n.d.                 | 0.11                      | 50.74                   |
| GA | [2016] | 62.54                    | n.d.                   | n.d.                   | 11.23                     | n.d.                 | 0.19                      | 16.40                   |
|    | [2017] | 44.06                    | 5.46                   | n.d.                   | 12.03                     | n.d.                 | 10.32                     | 6.31                    |
|    |        | <b>46.45 ± 15.04 cde</b> | <b>1.88 ± 3.10 abc</b> | <b>n.d. a</b>          | <b>10.80 ± 1.50 abcde</b> | <b>n.d.</b>          | <b>3.54 ± 5.87 a</b>      | <b>24.48 ± 23.29 ab</b> |
|    | [2015] | 13.97                    | n.d.                   | n.d.                   | 9.38                      | n.d.                 | 8.88                      | 55.43                   |
| HI | [2016] | 16.38                    | 1.44                   | n.d.                   | 7.62                      | n.d.                 | 28.51                     | 41.07                   |
|    |        | <b>15.18 ± 1.71 ab</b>   | <b>0.72 ± 1.02 ab</b>  | <b>n.d. ab</b>         | <b>8.50 ± 1.24 abcd</b>   | <b>n.d.</b>          | <b>18.70 ± 13.88 abcd</b> | <b>48.25 ± 10.15 b</b>  |
|    | [2015] | 51.68                    | 0.19                   | 1.75                   | 29.98                     | 0.00                 | 2.82                      | 10.04                   |
| MA | [2016] | 47.58                    | n.d.                   | 0.72                   | 19.04                     | 0.00                 | 3.72                      | 26.70                   |
|    | [2017] | 46.67                    | 7.64                   | 0.70                   | 19.77                     | 0.41                 | 7.40                      | 7.84                    |
|    |        | <b>48.64 ± 2.67 cde</b>  | <b>2.61 ± 4.36 abc</b> | <b>1.06 ± 0.60 ab</b>  | <b>22.93 ± 6.12 f</b>     | <b>0.14 ± 0.24 a</b> | <b>4.65 ± 2.43 a</b>      | <b>14.86 ± 10.31 ab</b> |
|    | [2015] | 8.90                     | 7.35                   | 0.24                   | 2.88                      | 0.07                 | 7.25                      | 72.09                   |
| ME | [2016] | 34.52                    | 9.14                   | 0.65                   | 6.92                      | 0.16                 | 36.91                     | 8.04                    |
|    | [2017] | 37.14                    | 12.08                  | 0.69                   | 5.73                      | n.d.                 | 32.33                     | 3.91                    |
|    |        | <b>26.85 ± 15.61 abc</b> | <b>9.52 ± 2.39 c</b>   | <b>0.53 ± 0.25 ab</b>  | <b>5.18 ± 2.07 ab</b>     | <b>0.08 ± 0.08 a</b> | <b>25.50 ± 15.97 d</b>    | <b>28.02 ± 38.22 ab</b> |
|    | [2015] | 46.08                    | 0.80                   | 1.22                   | 10.04                     | n.d.                 | 0.53                      | 37.31                   |
| MZ | [2016] | 63.74                    | 5.09                   | 3.96                   | 15.47                     | n.d.                 | 5.52                      | 2.93                    |
|    | [2017] | 67.30                    | 1.08                   | 1.51                   | 15.23                     | n.d.                 | 5.79                      | 0.55                    |
|    |        | <b>59.04 ± 11.37 e</b>   | <b>2.32 ± 2.40 abc</b> | <b>2.23 ± 1.51 ab</b>  | <b>13.58 ± 3.07 bcdef</b> | <b>n.d. a</b>        | <b>3.95 ± 2.96 a</b>      | <b>13.60 ± 20.57 ab</b> |
|    | [2015] | 8.43                     | 5.84                   | n.d.                   | 0.95                      | n.d.                 | 5.25                      | 0.50                    |
| MH | [2016] | 4.16                     | 7.10                   | n.d.                   | 0.51                      | n.d.                 | 21.23                     | 22.33                   |
|    | [2017] | 5.36                     | 2.14                   | 1.72                   | 1.75                      | n.d.                 | 5.53                      | 0.21                    |
|    |        | <b>5.98 ± 2.20 a</b>     | <b>5.03 ± 2.58 abc</b> | <b>0.57 ± 0.99 ab</b>  | <b>1.07 ± 0.62 a</b>      | <b>n.d. a</b>        | <b>10.67 ± 9.15 abc</b>   | <b>7.68 ± 12.69 a</b>   |
| MO | [2015] | 49.94                    | 1.04                   | 1.02                   | 19.49                     | 0.47                 | 1.40                      | 18.44                   |
|    | [2016] | 32.82                    | n.d.                   | 0.21                   | 6.91                      | n.d.                 | 1.56                      | 51.60                   |



|    |        |                          |                        |                        |                            |                      |                           |                         |
|----|--------|--------------------------|------------------------|------------------------|----------------------------|----------------------|---------------------------|-------------------------|
| PN | [2017] | 32.62                    | 23.32                  | 1.18                   | 10.43                      | 0.20                 | 12.29                     | 12.03                   |
|    |        | <b>38.46 ± 9.94 bcde</b> | <b>8.12 ± 13.18 bc</b> | <b>0.80 ± 0.52 ab</b>  | <b>12.28 ± 6.49 bcdef</b>  | <b>0.22 ± 0.23 a</b> | <b>5.08 ± 6.24 a</b>      | <b>27.36 ± 21.24 ab</b> |
|    | [2015] | 38.80                    | n.d.                   | 0.49                   | 20.45                      | 0.11                 | 27.52                     | 5.06                    |
|    | [2016] | 25.35                    | 6.60                   | 0.62                   | 4.83                       | n.d.                 | 18.47                     | 40.48                   |
|    | [2017] | 34.06                    | 3.08                   | 0.90                   | 8.28                       | n.d.                 | 5.68                      | 42.87                   |
| PC |        | <b>32.73 ± 6.82 bcd</b>  | <b>3.23 ± 3.30 abc</b> | <b>0.67 ± 0.21 ab</b>  | <b>11.19 ± 8.20 abcde</b>  | <b>0.04 ± 0.06 a</b> | <b>17.22 ± 10.97 abcd</b> | <b>29.47 ± 21.17 ab</b> |
|    | [2015] | 40.96                    | 1.85                   | 0.89                   | 15.38                      | n.d.                 | 1.98                      | 34.98                   |
|    | [2016] | 44.11                    | 4.72                   | 1.06                   | 9.16                       | n.d.                 | 5.85                      | 33.52                   |
|    | [2017] | 54.52                    | 0.19                   | 5.62                   | 22.51                      | 0.58                 | 5.12                      | 3.63                    |
|    |        | <b>46.53 ± 7.10 cde</b>  | <b>2.25 ± 2.29 abc</b> | <b>2.52 ± 2.68 abc</b> | <b>15.68 ± 6.68 bcdef</b>  | <b>0.19 ± 0.33 a</b> | <b>4.32 ± 2.06 a</b>      | <b>24.05 ± 17.69 ab</b> |
| PE | [2016] | 43.31                    | 3.47                   | 0.82                   | 4.50                       | 0.14                 | 7.68                      | 35.59                   |
|    | [2017] | 65.63                    | 9.06                   | 0.55                   | 8.59                       | n.d.                 | 7.89                      | 3.75                    |
|    |        | <b>54.47 ± 15.78 de</b>  | <b>6.26 ± 3.95 abc</b> | <b>0.69 ± 0.19 ab</b>  | <b>6.54 ± 2.89 abc</b>     | <b>0.07 ± 0.10 a</b> | <b>7.79 ± 0.15 ab</b>     | <b>19.67 ± 22.52 ab</b> |
|    | [2015] | 46.18                    | 0.26                   | 0.19                   | 10.11                      | n.d.                 | 0.53                      | 23.05                   |
|    | [2016] | 46.70                    | 3.85                   | 0.70                   | 10.76                      | n.d.                 | 5.21                      | 29.58                   |
| TE | [2017] | 64.39                    | 0.91                   | 2.43                   | 15.42                      | 0.12                 | 6.93                      | 4.73                    |
|    |        | <b>52.42 ± 10.37 de</b>  | <b>1.67 ± 1.91 ab</b>  | <b>1.11 ± 1.17 ab</b>  | <b>12.10 ± 2.90 abcdef</b> | <b>0.04 ± 0.07 a</b> | <b>4.23 ± 3.31 a</b>      | <b>19.12 ± 12.88 ab</b> |
|    | [2019] | 45.78                    | 2.93                   | 0.62                   | 5.74                       | n.d.                 | 6.59                      | 30.80                   |
|    | [2020] | 51.30                    | 5.01                   | 0.59                   | 4.54                       | 0.36                 | 10.13                     | 17.82                   |
|    |        | <b>48.54 ± 3.90 cde</b>  | <b>3.97 ± 1.47abc</b>  | <b>0.61 ± 0.02 ab</b>  | <b>5.14 ± 0.85 ab</b>      | <b>0.18 ± 0.25 a</b> | <b>8.36 ± 2.50 ab</b>     | <b>24.31 ± 9.18 ab</b>  |

|    |        |                           |                      |                       |                         |               |                           |                      |
|----|--------|---------------------------|----------------------|-----------------------|-------------------------|---------------|---------------------------|----------------------|
| ZA | [2015] | 20.33                     | 0.34                 | n.d.                  | 5.62                    | n.d.          | 28.61                     | 0.82                 |
|    | [2016] | 60.25                     | 0.17                 | 15.33                 | 11.59                   | n.d.          | 4.56                      | 3.86                 |
|    |        | <b>40.29 ± 28.23 bcde</b> | <b>0.25 ± 0.12 a</b> | <b>7.66 ± 10.84 c</b> | <b>8.61 ± 4.22 abcd</b> | <b>n.d. a</b> | <b>16.59 ± 17.01 abcd</b> | <b>2.34 ± 2.15 a</b> |

|              |  |    |    |    |   |    |   |    |
|--------------|--|----|----|----|---|----|---|----|
| Significance |  | ** | ns | ns | * | ns | * | ns |
|--------------|--|----|----|----|---|----|---|----|

| Variety | Year   | %KETONES              | %LACTONS      | %TERPENES             | %NORISOPRENOIDS      | %PAH’S                | %SESQUITERPENES        |
|---------|--------|-----------------------|---------------|-----------------------|----------------------|-----------------------|------------------------|
| AT      | [2015] | 3.07                  | n.d.          | 5.77                  | n.d.                 | n.d.                  | 0.19                   |
|         | [2016] | 0.63                  | n.d.          | 6.11                  | 0.03                 | 1.27                  | 0.11                   |
|         | [2017] | 0.63                  | n.d.          | 11.85                 | n.d.                 | 0.20                  | 0.04                   |
|         |        | <b>1.44 ± 1.41 ab</b> | <b>n.d. a</b> | <b>7.91 ± 3.41 ab</b> | <b>0.01 ± 0.01 a</b> | <b>0.49 ± 0.68 ab</b> | <b>0.11 ± 0.08 cde</b> |

|     |        |                       |               |                        |                      |                       |                          |
|-----|--------|-----------------------|---------------|------------------------|----------------------|-----------------------|--------------------------|
| CO  | [2015] | 0.33                  | n.d.          | 0.40                   | n.d.                 | 0.02                  | 0.03                     |
|     | [2016] | 0.53                  | n.d.          | 0.96                   | n.d.                 | 0.13                  | 0.02                     |
|     | [2017] | 1.16                  | n.d.          | 4.77                   | 0.01                 | 0.58                  | 0.08                     |
|     |        | <b>0.67 ± 0.43 ab</b> | <b>n.d. a</b> | <b>2.05 ± 2.38 a</b>   | <b>0.00 a</b>        | <b>0.24 ± 0.30 ab</b> | <b>0.04 ± 0.03 abc</b>   |
| ES  | [2015] | 0.71                  | n.d.          | 4.01                   | n.d.                 | 0.27                  | 0.02                     |
|     | [2016] | 2.02                  | n.d.          | 0.46                   | n.d.                 | 1.33                  | 0.12                     |
|     | [2017] | 1.48                  | n.d.          | 6.88                   | 0.07                 | 0.67                  | n.d.                     |
|     |        | <b>1.40 ± 0.66 ab</b> | <b>n.d. a</b> | <b>3.79 ± 3.22 a</b>   | <b>0.02 ± 0.04 a</b> | <b>0.76 ± 0.54 b</b>  | <b>0.05 ± 0.06 abcd</b>  |
| EV3 | [2015] | 0.34                  | n.d.          | 12.33                  | n.d.                 | 0.20                  | 0.02                     |
|     | [2016] | 0.87                  | n.d.          | 7.60                   | n.d.                 | 0.34                  | 0.01                     |
|     | [2017] | 0.49                  | n.d.          | 10.73                  | n.d.                 | 0.29                  | 0.06                     |
|     |        | <b>0.57 ± 0.28 ab</b> | <b>n.d. a</b> | <b>10.22 ± 2.41 ab</b> | <b>n.d. a</b>        | <b>0.28 ± 0.07 ab</b> | <b>0.03 ± 0.03 abc</b>   |
| EV4 | [2015] | 0.31                  | n.d.          | 17.57                  | n.d.                 | n.d.                  | 0.11                     |
|     | [2016] | 0.57                  | n.d.          | 3.86                   | n.d.                 | 0.03                  | 0.07                     |
|     | [2017] | 2.97                  | n.d.          | 9.25                   | n.d.                 | 0.39                  | 0.07                     |
|     |        | <b>1.29 ± 1.47 ab</b> | <b>n.d. a</b> | <b>10.23 ± 6.91 ab</b> | <b>n.d. a</b>        | <b>0.14 ± 0.22 a</b>  | <b>0.08 ± 0.02 abcde</b> |
|     |        |                       |               |                        |                      |                       |                          |
| EV6 | [2015] | 0.35                  | n.d.          | 2.98                   | n.d.                 | n.d.                  | n.d.                     |
|     | [2016] | 1.55                  | n.d.          | 1.14                   | n.d.                 | 0.70                  | n.d.                     |
|     | [2017] | 0.60                  | n.d.          | 0.78                   | n.d.                 | 0.15                  | n.d.                     |
|     |        | <b>0.83 ± 0.63 ab</b> | <b>n.d. a</b> | <b>1.63 ± 1.18 a</b>   | <b>n.d. a</b>        | <b>0.28 ± 0.37 ab</b> | <b>n.d. a</b>            |
| FE  | [2015] | 0.15                  | n.d.          | 5.88                   | n.d.                 | n.d.                  | n.d.                     |
|     | [2016] | 2.08                  | n.d.          | 0.96                   | n.d.                 | 1.03                  | n.d.                     |
|     | [2017] | 0.79                  | n.d.          | 4.16                   | n.d.                 | 0.38                  | n.d.                     |
|     |        | <b>1.00 ± 0.98 ab</b> | <b>n.d. a</b> | <b>3.66 ± 2.50 a</b>   | <b>n.d. a</b>        | <b>0.47 ± 0.52 ab</b> | <b>n.d. a</b>            |
| GN  | [2016] | 1.05                  | n.d.          | 3.15                   | n.d.                 | 0.31                  | 0.15                     |
|     | [2017] | 1.01                  | n.d.          | 9.60                   | n.d.                 | 0.61                  | 0.16                     |
|     |        | <b>1.03 ± 0.03 ab</b> | <b>n.d. a</b> | <b>6.38 ± 4.56 ab</b>  | <b>n.d. a</b>        | <b>0.46 ± 0.21 ab</b> | <b>0.15 ± 0.01 ef</b>    |
| GA  | [2015] | 0.60                  | n.d.          | 6.37                   | 0.07                 | 0.04                  | 0.02                     |
|     | [2016] | 0.22                  | n.d.          | 9.42                   | n.d.                 | n.d.                  | n.d.                     |

|    |        |                       |                      |                        |                      |                       |                          |
|----|--------|-----------------------|----------------------|------------------------|----------------------|-----------------------|--------------------------|
|    | [2017] | 1.40                  | n.d.                 | 19.99                  | n.d.                 | 0.43                  | n.d.                     |
|    |        | <b>0.74 ± 0.60 ab</b> | <b>n.d. a</b>        | <b>11.93 ± 7.15 ab</b> | <b>0.02 ± 0.04 a</b> | <b>0.16 ± 0.24 ab</b> | <b>0.01 ± 0.01 ab</b>    |
|    |        |                       |                      |                        |                      |                       |                          |
|    |        |                       |                      |                        |                      |                       |                          |
| HI | [2015] | 0.35                  | n.d.                 | 11.92                  | n.d.                 | 0.06                  | 0.01                     |
|    | [2016] | 0.66                  | n.d.                 | 4.06                   | n.d.                 | 0.24                  | n.d.                     |
|    |        | <b>0.51 ± 0.22 ab</b> | <b>n.d. a</b>        | <b>7.99 ± 5.56 ab</b>  | <b>n.d. a</b>        | <b>0.15 ± 0.13 a</b>  | <b>0.00 ab</b>           |
|    |        |                       |                      |                        |                      |                       |                          |
| MA | [2015] | 0.50                  | n.d.                 | 2.83                   | n.d.                 | 0.16                  | 0.03                     |
|    | [2016] | 0.40                  | n.d.                 | 1.67                   | n.d.                 | 0.11                  | 0.07                     |
|    | [2017] | 2.60                  | n.d.                 | 6.04                   | 0.01                 | 0.86                  | 0.06                     |
|    |        | <b>1.17 ± 1.24 ab</b> | <b>n.d. a</b>        | <b>3.51 ± 2.26 a</b>   | <b>0.00 a</b>        | <b>0.38 ± 0.42 ab</b> | <b>0.05 ± 0.02 abcd</b>  |
| ME | [2015] | 0.43                  | n.d.                 | 0.67                   | n.d.                 | 0.12                  | n.d.                     |
|    | [2016] | 1.30                  | 0.03                 | 2.07                   | n.d.                 | 0.26                  | n.d.                     |
|    | [2017] | 3.98                  | 0.01                 | 3.36                   | n.d.                 | 0.66                  | 0.10                     |
|    |        | <b>1.90 ± 1.85 b</b>  | <b>0.01 ± 0.01 b</b> | <b>2.03 ± 1.35 a</b>   | <b>n.d. a</b>        | <b>0.34 ± 0.28 ab</b> | <b>0.04 ± 0.06 abc</b>   |
|    |        |                       |                      |                        |                      |                       |                          |
| MZ | [2015] | 0.40                  | n.d.                 | 3.53                   | n.d.                 | 0.11                  | n.d.                     |
|    | [2016] | 1.45                  | n.d.                 | 1.06                   | n.d.                 | 0.77                  | n.d.                     |
|    | [2017] | 0.60                  | n.d.                 | 7.69                   | n.d.                 | 0.26                  | n.d.                     |
|    |        | <b>0.81 ± 0.56 ab</b> | <b>n.d. a</b>        | <b>4.09 ± 3.35 a</b>   | <b>n.d. a</b>        | <b>0.38 ± 0.35 ab</b> | <b>n.d. a</b>            |
| MH | [2015] | 0.01                  | n.d.                 | 78.99                  | n.d.                 | n.d.                  | 0.02                     |
|    | [2016] | 0.38                  | n.d.                 | 44.27                  | n.d.                 | n.d.                  | 0.01                     |
|    | [2017] | 0.53                  | n.d.                 | 82.44                  | n.d.                 | 0.18                  | 0.14                     |
|    |        | <b>0.31 ± 0.27 a</b>  | <b>n.d. a</b>        | <b>68.57 ± 21.11 c</b> | <b>n.d. a</b>        | <b>0.06 ± 0.11 a</b>  | <b>0.06 ± 0.07 abcd</b>  |
| MO | [2015] | 1.86                  | n.d.                 | 5.57                   | n.d.                 | 0.78                  | n.d.                     |
|    | [2016] | 0.54                  | n.d.                 | 6.12                   | n.d.                 | n.d.                  | 0.24                     |
|    | [2017] | 3.19                  | 0.03                 | 4.34                   | n.d.                 | 0.34                  | 0.02                     |
|    |        | <b>1.86 ± 1.33 b</b>  | <b>0.01 ± 0.02 b</b> | <b>5.34 ± 0.92 a</b>   | <b>n.d. a</b>        | <b>0.37 ± 0.39 ab</b> | <b>0.09 ± 0.13 abcde</b> |
| PN | [2015] | 0.52                  | n.d.                 | 6.82                   | n.d.                 | n.d.                  | 0.25                     |
|    | [2016] | 0.96                  | n.d.                 | 2.44                   | n.d.                 | 0.14                  | 0.10                     |
|    | [2017] | 1.07                  | n.d.                 | 3.77                   | n.d.                 | 0.24                  | 0.06                     |
|    |        | <b>0.85 ± 0.29 ab</b> | <b>n.d. a</b>        | <b>4.34 ± 2.24 a</b>   | <b>n.d. a</b>        | <b>0.13 ± 0.12 a</b>  | <b>0.14 ± 0.10 de</b>    |

|              |        |                       |                       |                        |                      |                       |                         |
|--------------|--------|-----------------------|-----------------------|------------------------|----------------------|-----------------------|-------------------------|
| PC           | [2015] | 0.87                  | n.d.                  | 2.49                   | 0.05                 | 0.40                  | 0.14                    |
|              | [2016] | 0.38                  | n.d.                  | 0.92                   | n.d.                 | 0.17                  | 0.10                    |
|              | [2017] | 1.51                  | n.d.                  | 5.71                   | n.d.                 | 0.54                  | 0.07                    |
|              |        | <b>0.92 ± 0.57 ab</b> | <b>n.d. a</b>         | <b>3.04 ± 2.44 a</b>   | <b>0.02 ± 0.03 a</b> | <b>0.37 ± 0.19 ab</b> | <b>0.10 ± 0.04 cde</b>  |
| PE           | [2016] | 1.19                  | n.d.                  | 3.02                   | n.d.                 | 0.28                  | n.d.                    |
|              | [2017] | 0.10                  | n.d.                  | 4.39                   | 0.01                 | 0.02                  | 0.02                    |
|              |        | <b>0.65 ± 0.77 ab</b> | <b>n.d. a</b>         | <b>3.70 ± 0.97 a</b>   | <b>0.01 ± 0.01 a</b> | <b>0.15 ± 0.19 a</b>  | <b>0.01 ± 0.01 ab</b>   |
|              |        |                       |                       |                        |                      |                       |                         |
| TE           | [2015] | 0.88                  | n.d.                  | 18.23                  | 0.10                 | 0.28                  | 0.09                    |
|              | [2016] | 1.20                  | 0.01                  | 1.71                   | n.d.                 | 0.16                  | 0.11                    |
|              | [2017] | 1.25                  | n.d.                  | 3.00                   | 0.06                 | 0.68                  | 0.09                    |
|              |        | <b>1.11 ± 0.20 ab</b> | <b>0.00 ± 0.01 ab</b> | <b>7.65 ± 9.19 ab</b>  | <b>0.05 ± 0.05 a</b> | <b>0.37 ± 0.27 ab</b> | <b>0.09 ± 0.01 bcde</b> |
|              |        |                       |                       |                        |                      |                       |                         |
| XA           | [2019] | 0.86                  | n.d.                  | 6.13                   | n.d.                 | 0.31                  | 0.24                    |
|              | [2020] | 0.87                  | n.d.                  | 8.74                   | 0.01                 | 0.40                  | 0.23                    |
|              |        | <b>0.86 ± 0.00 ab</b> | <b>n.d. a</b>         | <b>7.43 ± 1.85 ab</b>  | <b>0.00 ± 0.01 a</b> | <b>0.36 ± 0.07 ab</b> | <b>0.23 ± 0.01 f</b>    |
|              |        |                       |                       |                        |                      |                       |                         |
| ZA           | [2015] | 0.56                  | n.d.                  | 42.61                  | 0.67                 | 0.34                  | 0.10                    |
|              | [2016] | 1.48                  | n.d.                  | 1.78                   | n.d.                 | 0.96                  | 0.02                    |
|              |        | <b>1.02 ± 0.65 ab</b> | <b>n.d. a</b>         | <b>22.19 ± 28.87 b</b> | <b>0.33 ± 0.47 b</b> | <b>0.65 ± 0.44 ab</b> | <b>0.06 ± 0.06 abcd</b> |
|              |        |                       |                       |                        |                      |                       |                         |
| Significance |        | ns                    | ns                    | ***                    | ns                   | ns                    | **                      |

PAHs.: polycyclic aromatic hydrocarbons; n.d.: non detected; ns indicates non-significant difference. Mean value, SD and different roman letters (a–d), showing significant differences according to Fisher’s test ( $p < 0.05$ ), are indicated in bold for each variety. See Table 1 for varieties abbreviations.
